# Supplementary material for: A Rapid Detection Method for Bridges Based on Impact Coefficient of Standard Bumping
Source: Hindawi journal article supplement (doi:10.1155/2018/9195289), 2018-09-30
Supplement: f1 [file 9195289.f1.zip]

Archive with 2 entries (2 files):
- 9195289.f1.opj
- 9195289.f2.opj
